# Supplementary material for: Designing high performance polymer nanocomposites by incorporating robustness-controlled polymeric nanoparticles: insights from molecular dynamics
Source: Royal Society of Chemistry journal article supplement (doi:10.1039/d1cp04254h), 2022-01-01
Supplement: d1cp04254h1.pdf [file d1cp04254h1.pdf]

# **Designing high performance polymer nanocomposites by incorporating robustness-controlled polymeric nanoparticles: insights from molecular dynamics**

Guanyi Hou<sup>1</sup>, Sai Li<sup>2,3</sup>, Jun Liu<sup>2,3\*</sup>, Yunxuan Weng<sup>1</sup>, Liqun Zhang<sup>2,3\*</sup>

1. College of Chemistry and Materials Engineering, Beijing Technology and Business University, People's Republic of China

2. State Key Laboratory of Organic-Inorganic Composites, Beijing University of Chemical Technology, People's Republic of China

3. Center of Advanced Elastomer Materials, Beijing University of Chemical Technology, People's Republic of China

## **Details of simulation model**

In this study, both  $\eta = 0$  and  $\eta = 1.0$  were obtained same mean-square radius gyration, which was equal to approximately  $5\sigma$ . The polymer matrix chains were fixed to be 100 beads, and each system contained 300 chains. For star-shaped nanoparticle (SSPNs), there are two sections: First section changed the hardness of NP, hence the  $\eta$  of star-shape systems were equal to 0.2, 0.4, 0.6, 0.8, respectively, and the arm length,  $L$ , was set as  $10\sigma$  (Figure S1); Second section changed the arm length of star-shaped NP, hence  $L$  was equal to  $5\sigma$ ,  $10\sigma$ ,  $15\sigma$ ,  $20\sigma$ , respectively, and  $\eta$  was set as 0.8. For all systems, the mass fraction of NPs was fixed as 20%. (Figure S2)

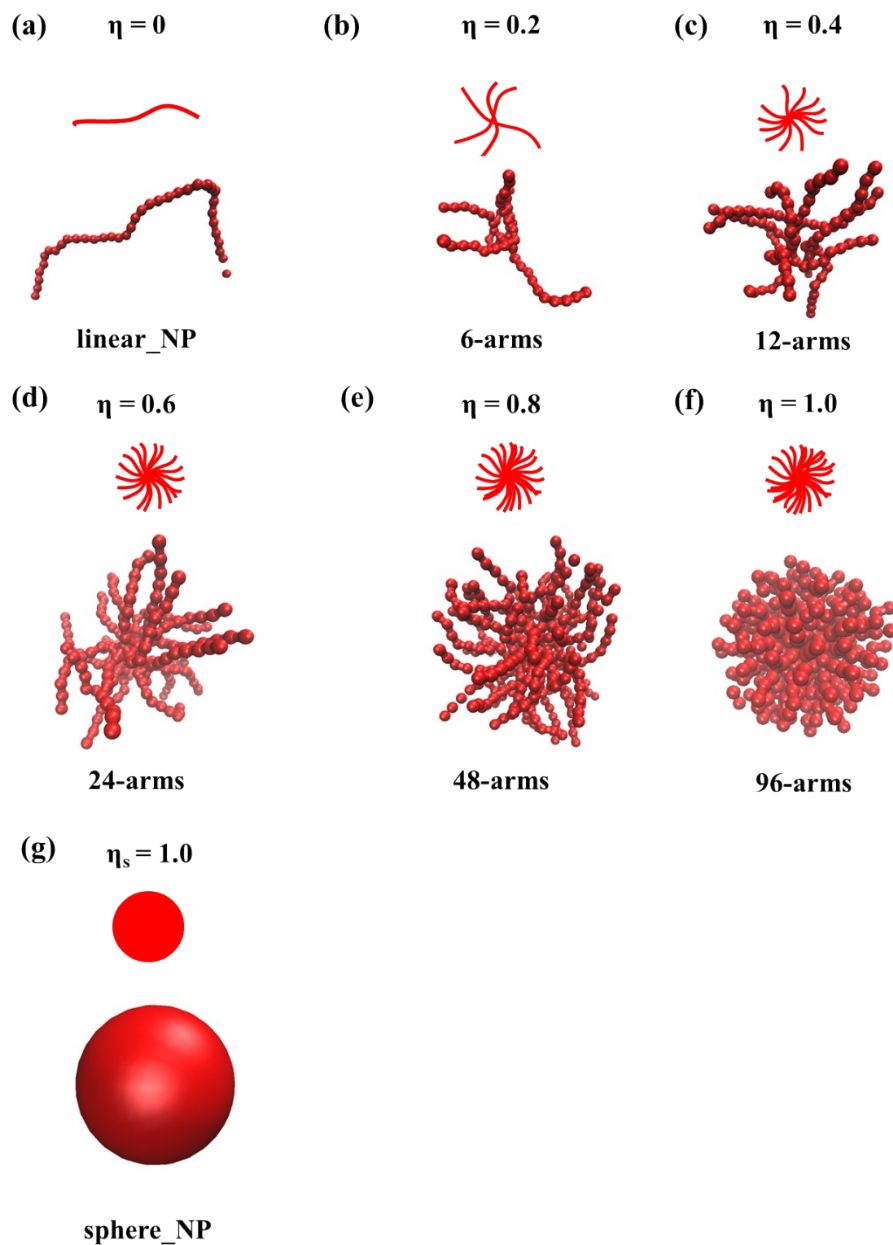

Figure S1. The schematic diagram of NP, including (a)  $\eta = 0$ ; (b)  $\eta = 0.2$ ; (c)  $\eta = 0.4$ ; (d)  $\eta = 0.6$ ; (e)  $\eta = 0.8$ ; (f)  $\eta = 1.0$ ; (g)  $\eta_s = 1.0$ ; Noted that both linear NP and SSPNs were composed by the red-sphere bead that diameter was equal to  $1\sigma$ .

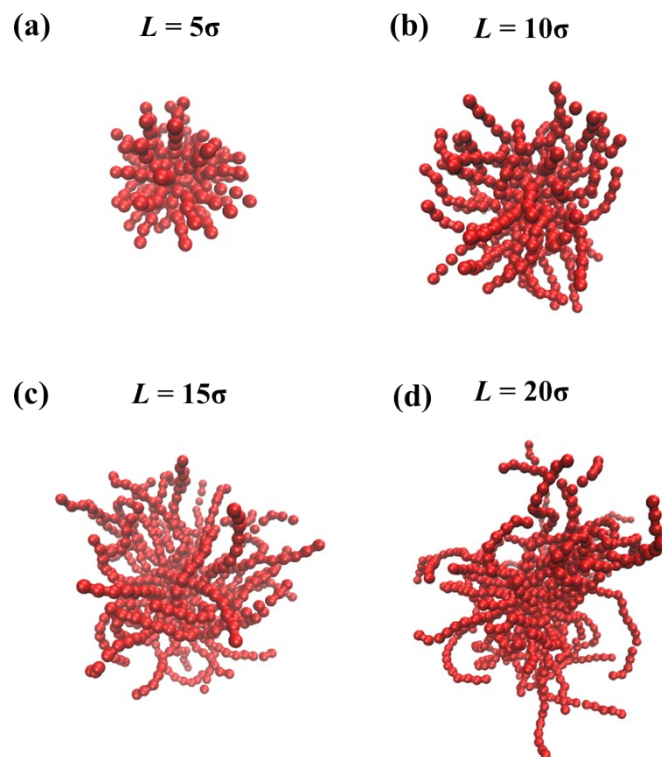

Figure S2. The schematic diagram for SSPNs with different  $L$ , where (a)  $L = 5\sigma$ ; (b)  $L = 10\sigma$ ; (c)  $L = 15\sigma$ ; (d)  $L = 20\sigma$ . Noted that  $\eta$  was set as 0.8.

Table S1. the mean-root square radius of gyration ( $R_g$ ) of NPs with different  $\eta$ .

| system         | $R_g$ ( $\sigma$ ) |
|----------------|--------------------|
| $\eta = 0$     | 5.1108             |
| $\eta = 0.2$   | 4.829              |
| $\eta = 0.4$   | 4.94               |
| $\eta = 0.6$   | 4.923              |
| $\eta = 0.8$   | 4.78842            |
| $\eta = 1.0$   | 4.9951             |
| $\eta_s = 1.0$ | 5                  |

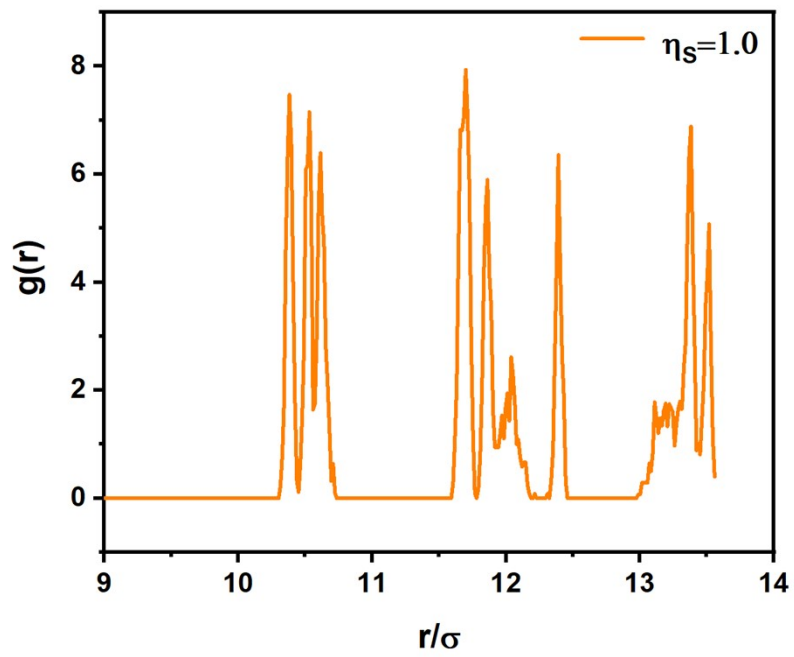

Figure S3. The radial distribution function of NP when  $\eta_s = 1.0$ .

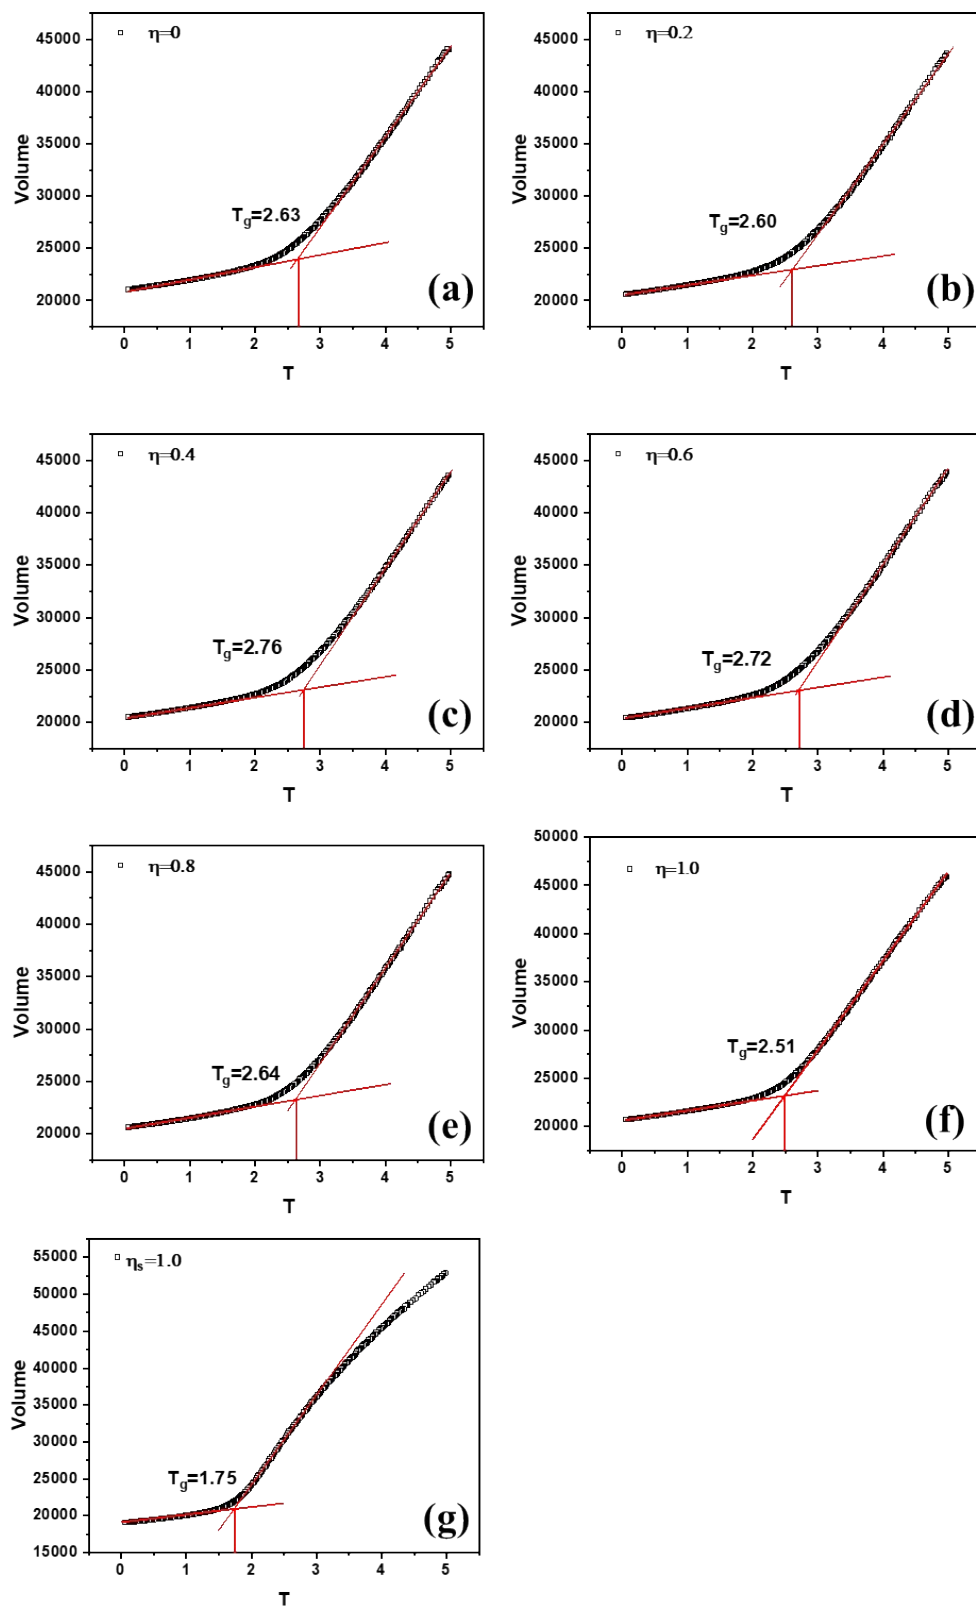

Figure S4. The glass transition temperature for PNCs when: (a)  $\eta = 0$ ; (b)  $\eta = 0.2$ ; (c)  $\eta = 0.4$ ; (d)  $\eta = 0.6$ ; (e)  $\eta = 0.8$ ; (f)  $\eta = 1.0$ ; (g)  $\eta_s = 1.0$

$\eta=0$

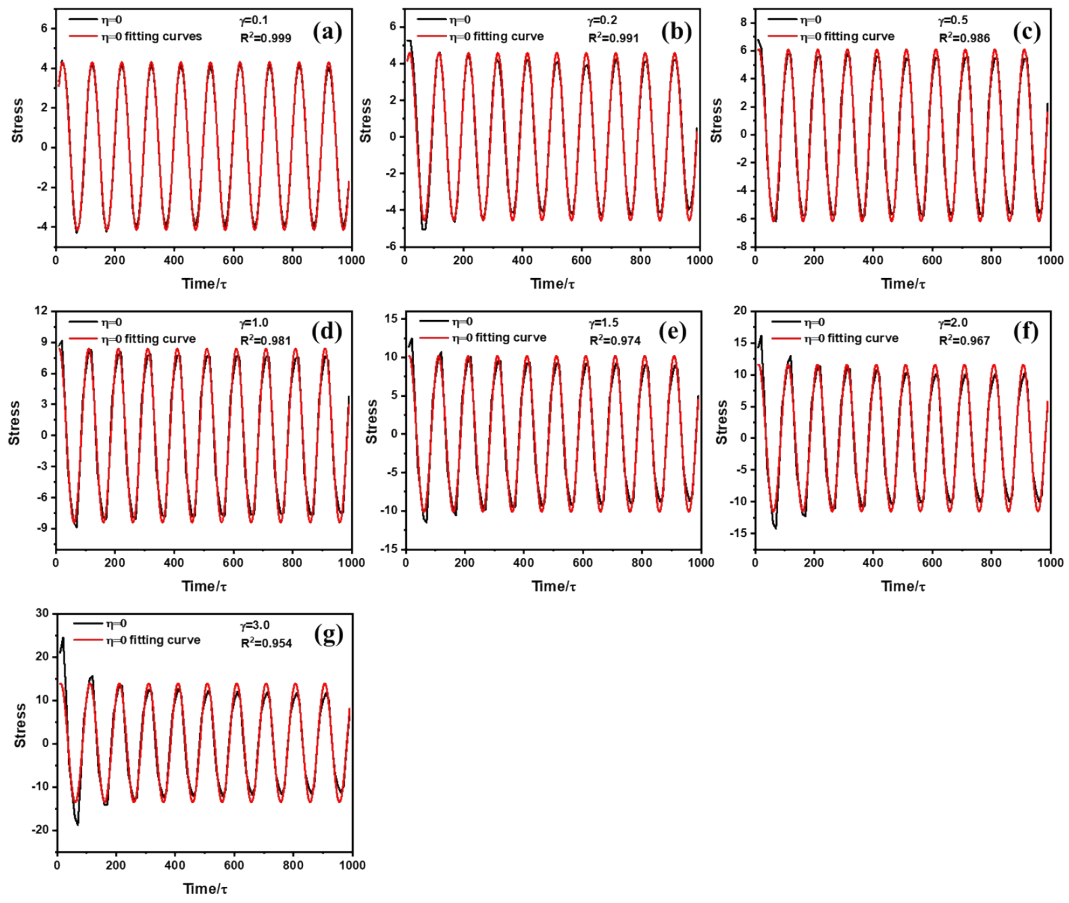

$\eta=0.2$

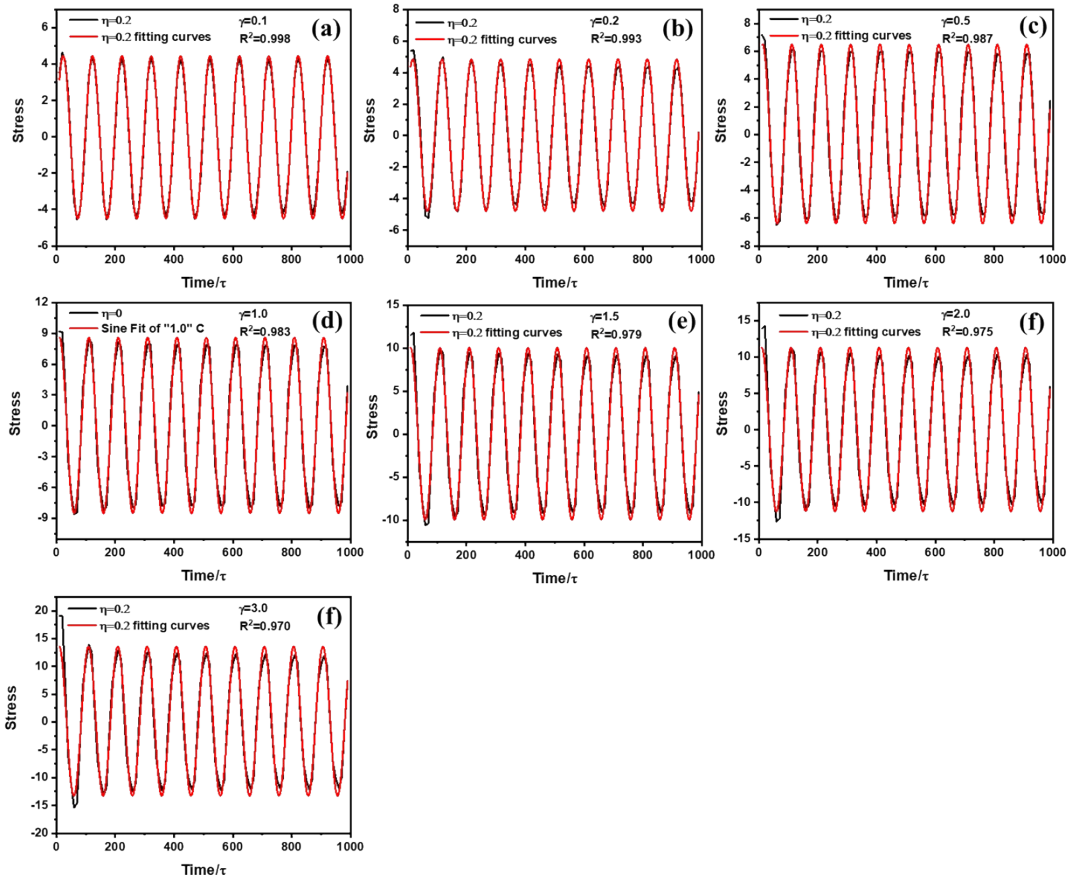

$\eta=0.4$

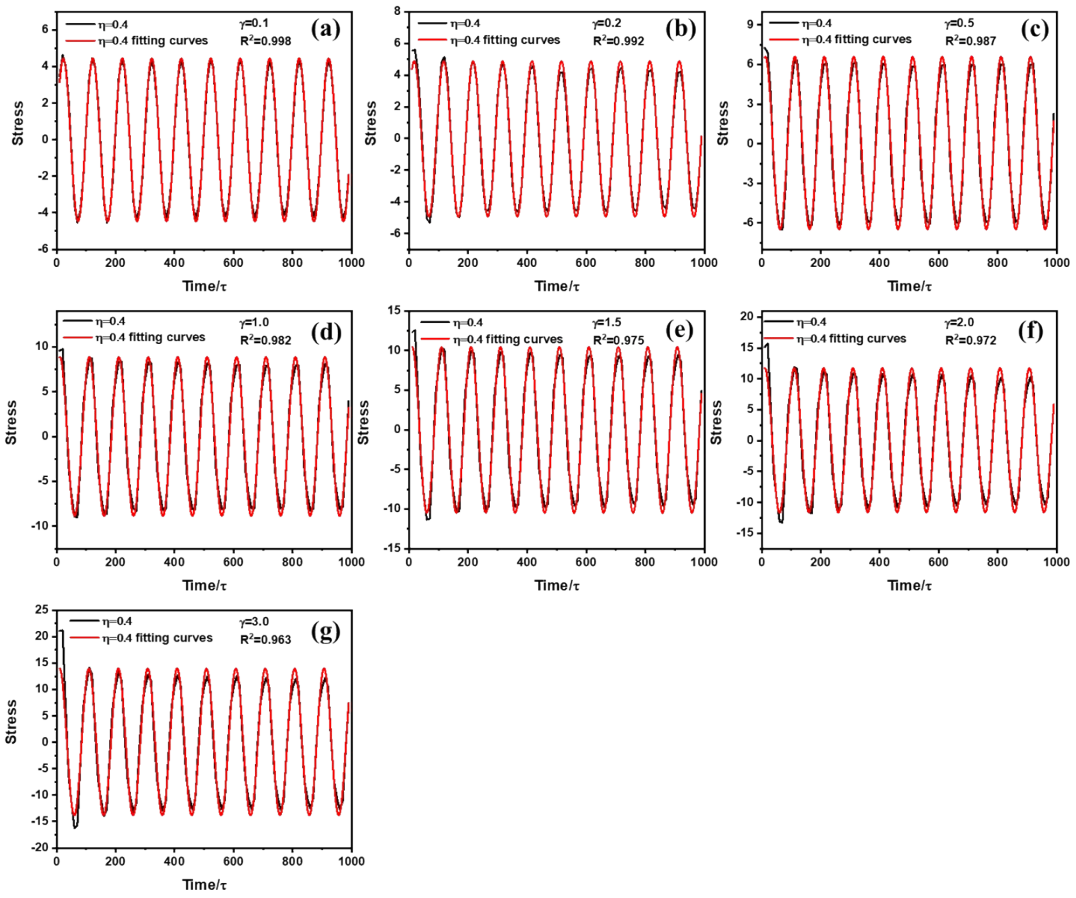

$\eta=0.6$



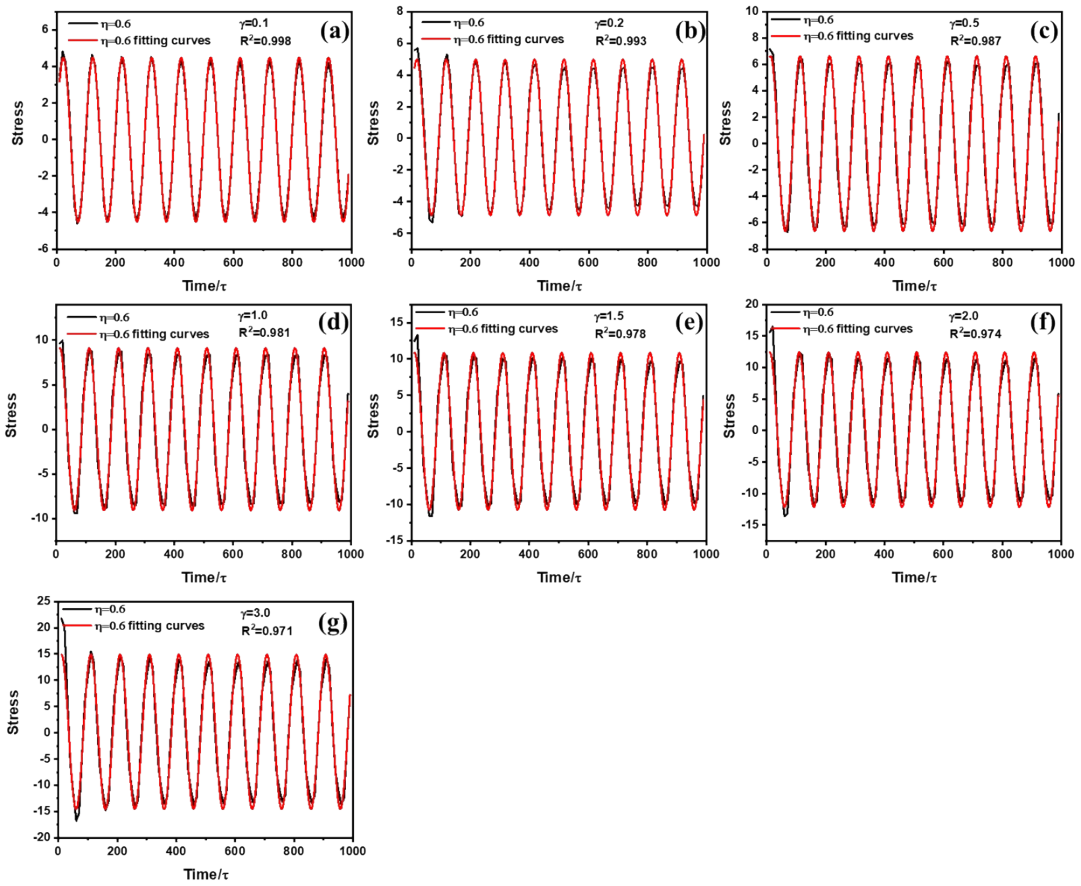

$\eta=0.8$

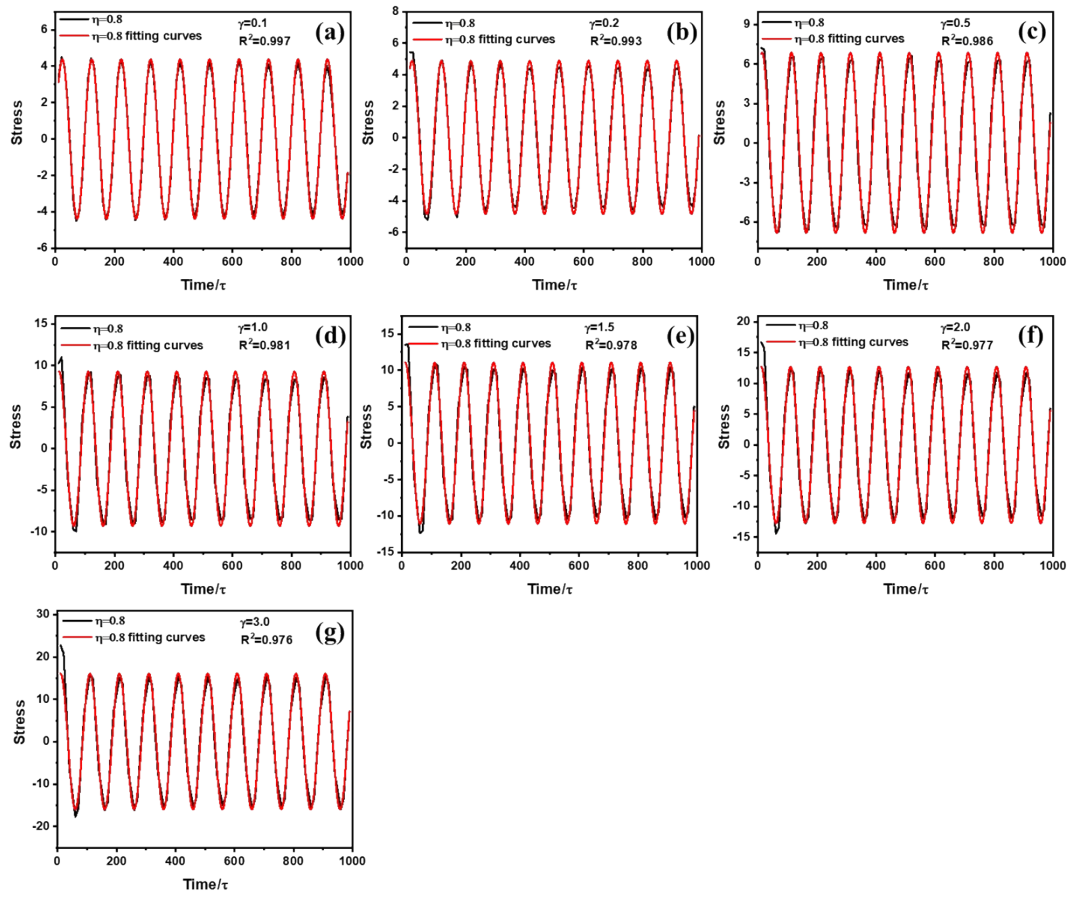

$\eta=1.0$

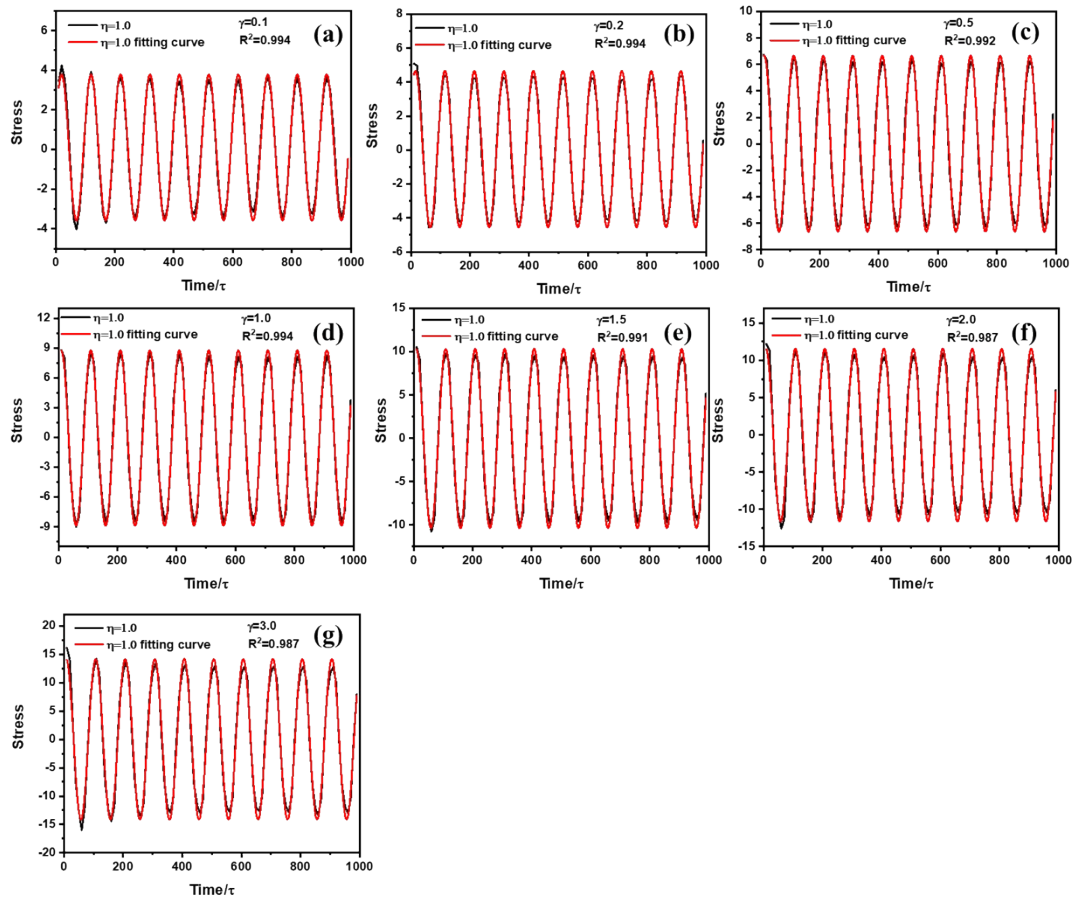

$\eta_s=1.0$

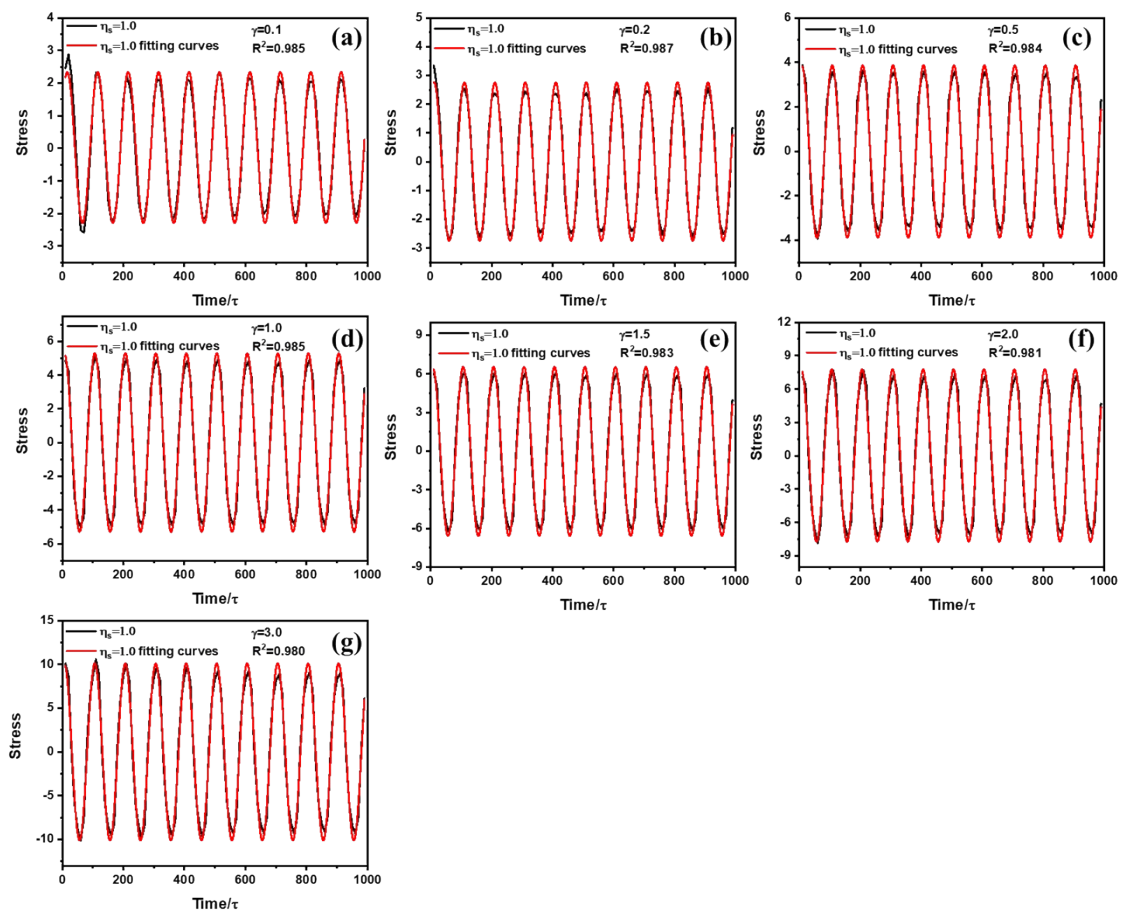

Figure S5. Shear stress-strain curves of SSPNs with different  $\eta$ , where (a)  $\gamma=0.1$ ; (b)  $\gamma=0.2$ ; (c)  $\gamma=0.5$ ; (d)  $\gamma=1.0$ ; (e)  $\gamma=1.5$ ; (f)  $\gamma=2.0$ ; (g)  $\gamma=3.0$ ;

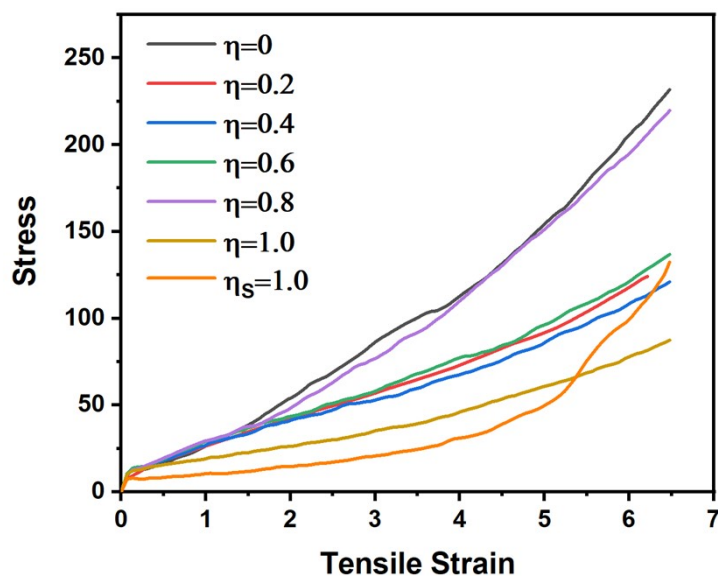

Figure S6. The stress-strain curve for different  $\eta$ .

Table S2.  $R_g$  of various  $L$ . Noted that  $\eta = 0.8$

| $L$ ( $\sigma$ ) | $R_g$ ( $\sigma$ ) |
|------------------|--------------------|
| 5                | 3.66               |
| 10               | 4.79               |
| 15               | 8.85               |
| 20               | 9.07               |

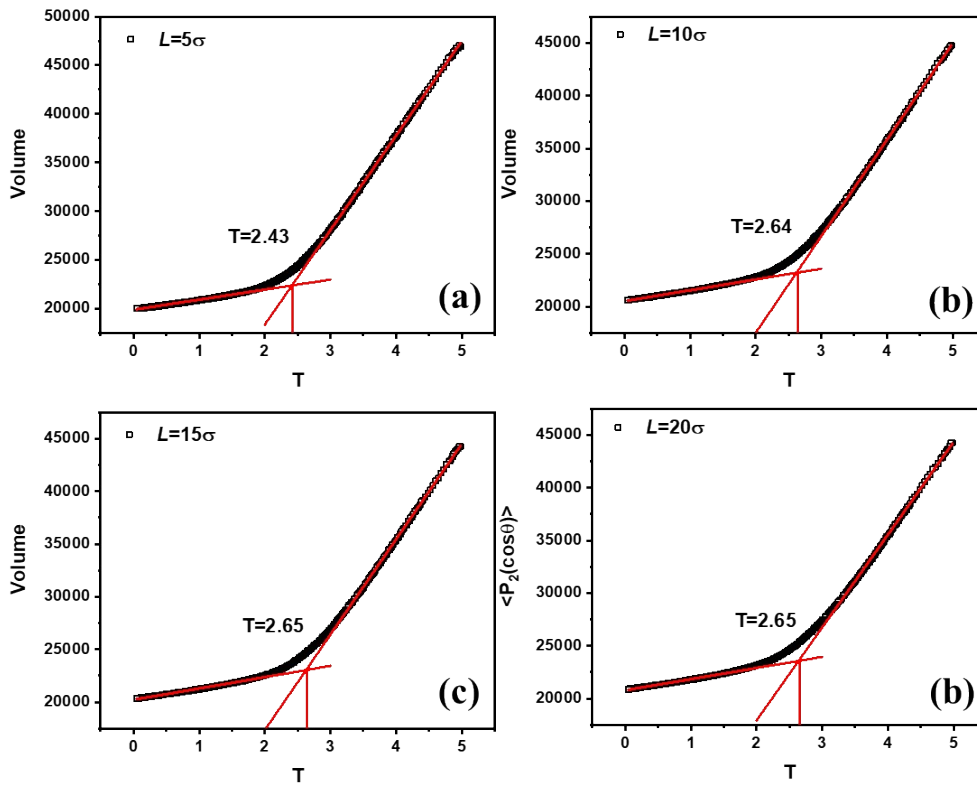

Figure S7. The glass transition temperature for PNCs when : (a)  $L = 5\sigma$ ; (b)  $L = 10\sigma$ ; (c)  $L = 15\sigma$ ; (d)  $L = 20\sigma$ . Noted that  $\eta = 0.8$ .

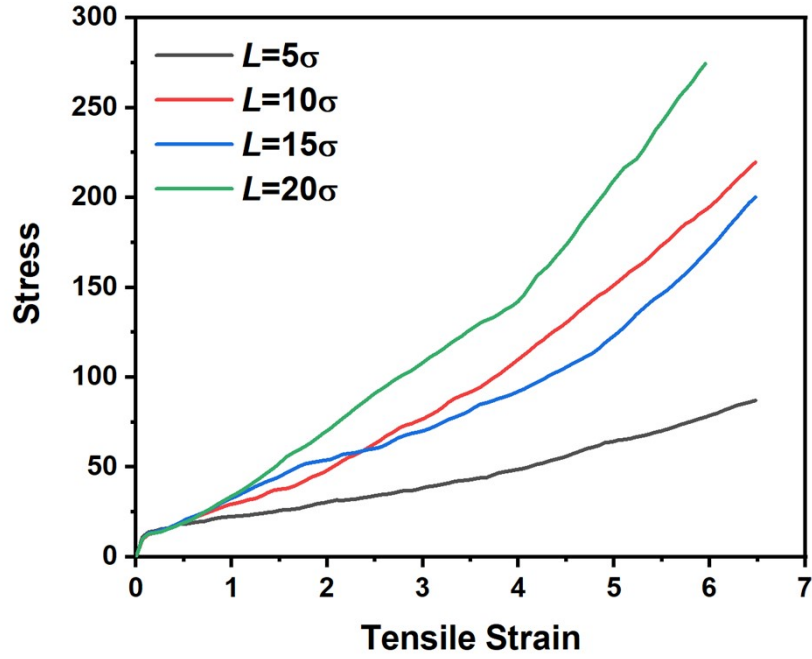

Figure S8. The stress-strain curve for different  $\eta$ .

$L = 5\sigma$

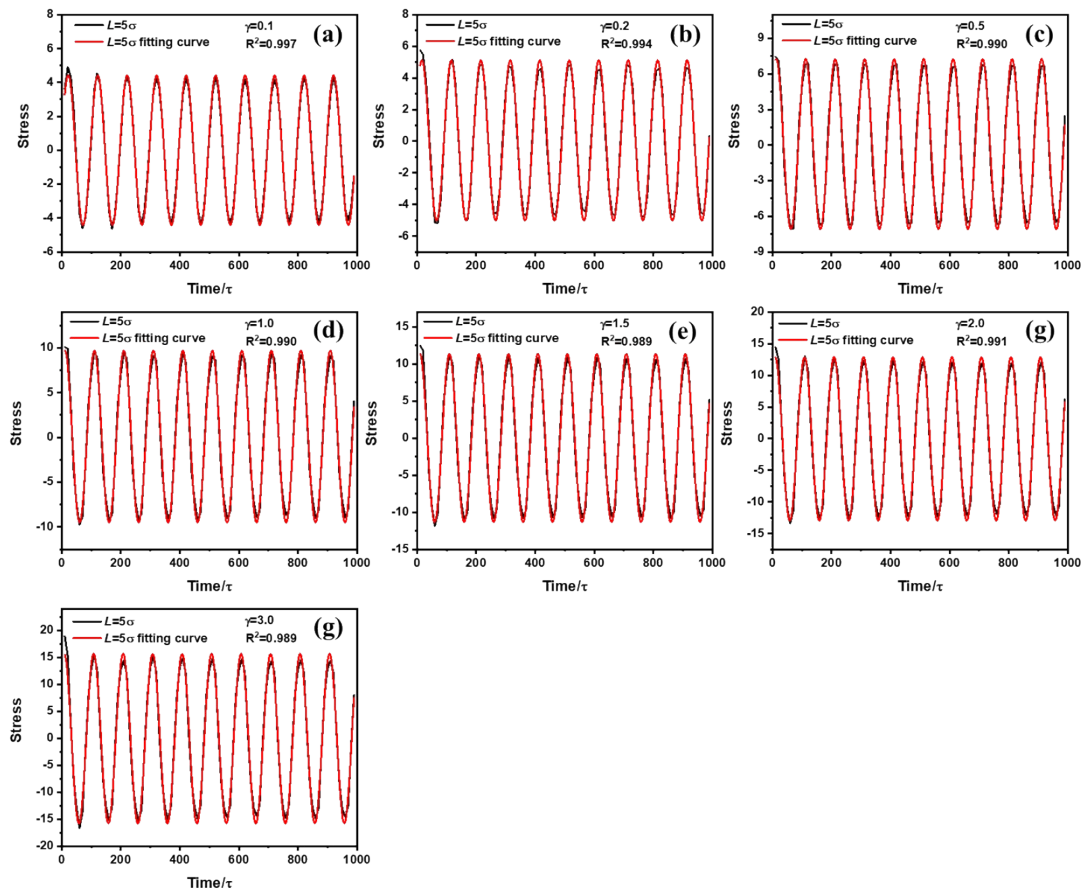

$L = 10\sigma$

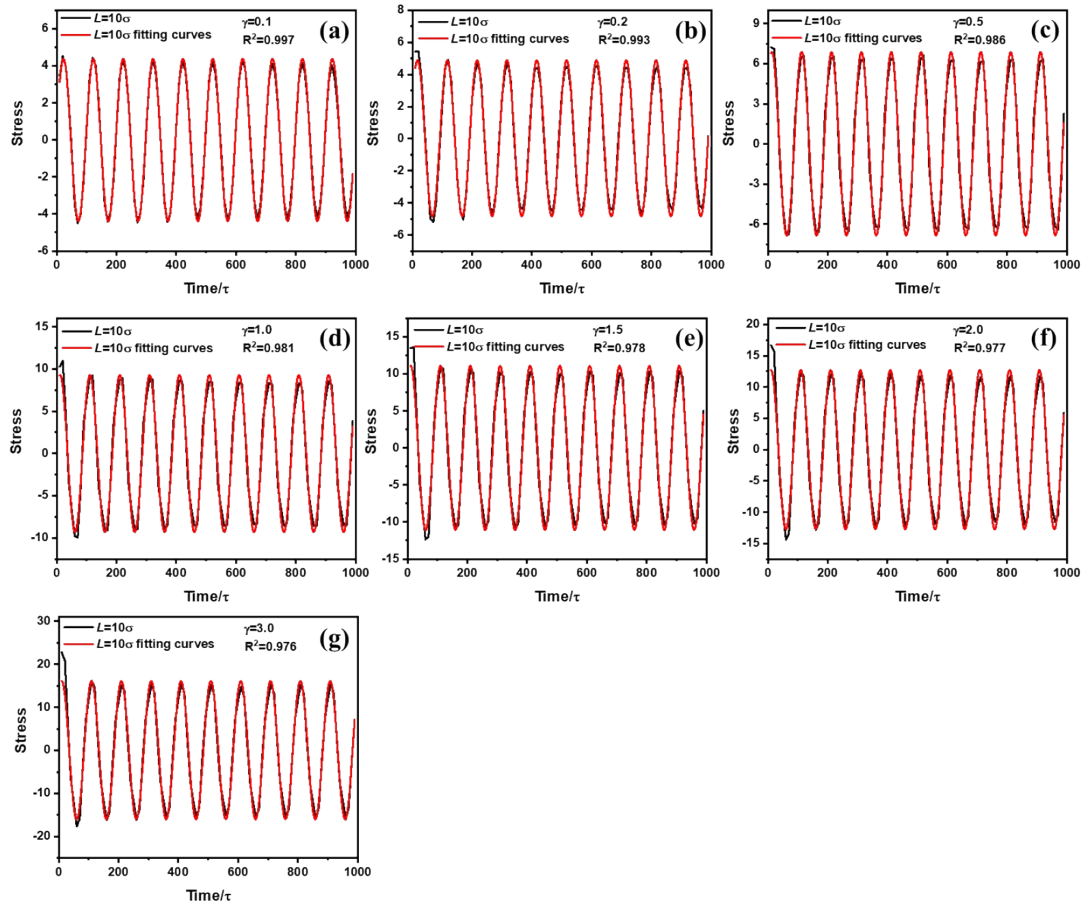

$L = 15\sigma$

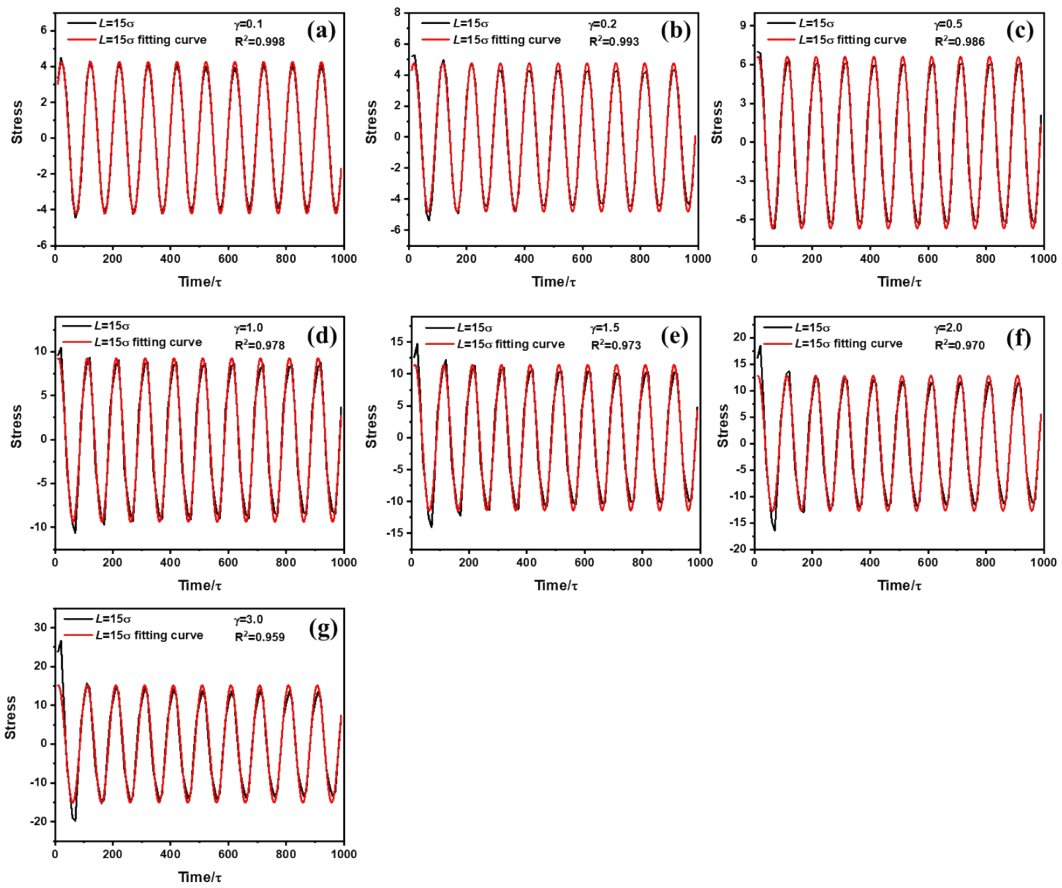

$$L = 20\sigma$$



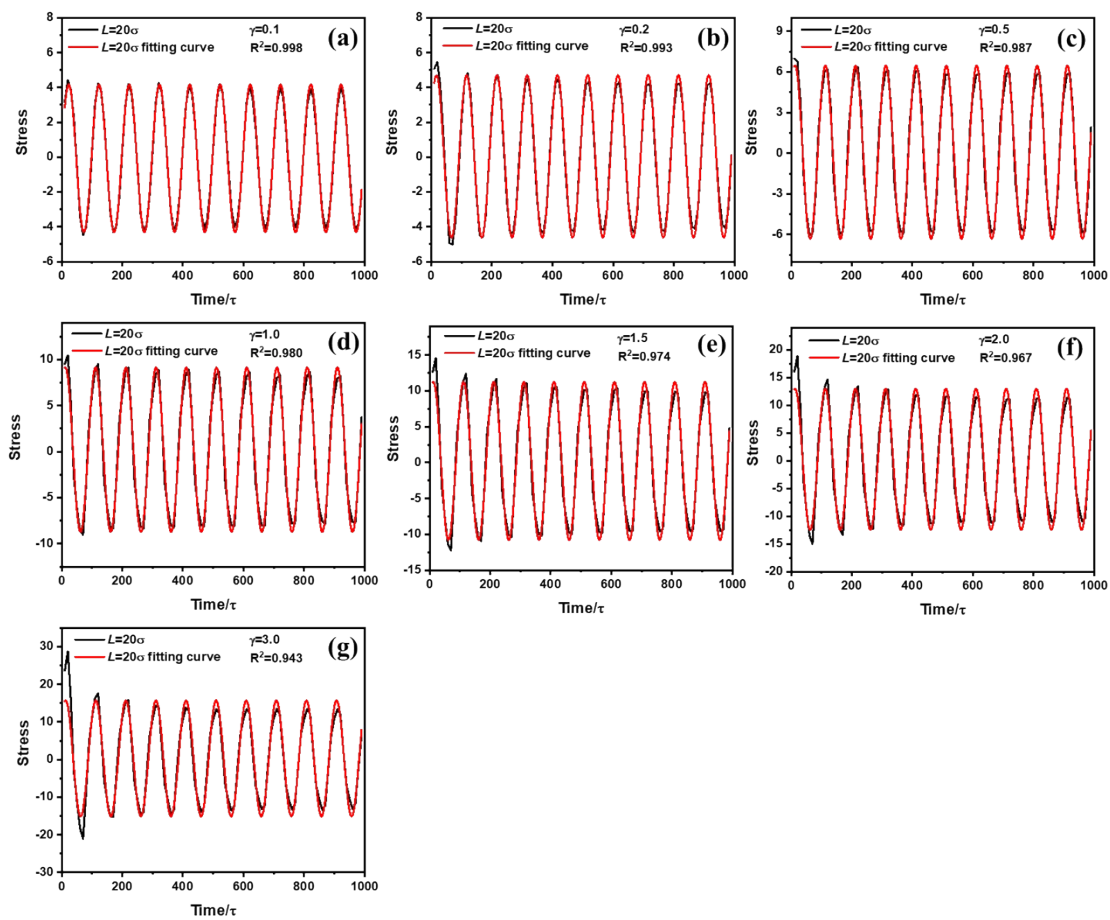

Figure S9. Shear stress-strain curves of SSPNs with different  $L$ , where (a)  $\gamma=0.1$ ; (b)  $\gamma=0.2$ ; (c)  $\gamma=0.5$ ; (d)  $\gamma=1.0$ ; (e)  $\gamma=1.5$ ; (f)  $\gamma=2.0$ ; (g)  $\gamma=3.0$ ;
